# Pituitary Transcription Factor-1 Induces Transient Differentiation of Adult Hepatic Stem Cells into Prolactin-Producing Cells *in Vivo*

Eun Jig Lee, Theron Russell, Lisa Hurley, and J. Larry Jameson

*Division of Endocrinology, Metabolism, and Molecular Medicine, Northwestern University, Feinberg School of Medicine, Chicago, Illinois 60611*

**A subset of transcription factors function as pivotal regulators of cell differentiation pathways. Pituitary transcription factor-1 (Pit-1) is a tissue-specific homeodomain protein that specifies the development of pituitary somatotropes and lactotropes. In this study, adenovirus was used to deliver rat Pit-1 to mouse liver. Pit-1 expression was detected in the majority (50–80%) of hepatocyte nuclei after tail vein injection ( $2 \times 10^9$  plaque forming units). Pit-1 activated hepatic expression of the endogenous prolactin (PRL), GH, and TSH $\beta$  genes along with several other markers of lactotrope pro-**

**genitor cells. Focal clusters (0.2–0.5% of liver cells per tissue section) of periportal cells were positive for PRL by immunofluorescent staining. The PRL-producing cells also expressed proliferating cell nuclear antigen as well as the hepatic stem cell markers (c-Kit, Thy1, and cytokeratin 14). These data indicate that Pit-1 induces the transient differentiation of hepatic progenitor cells into PRL-producing cells, providing additional evidence that transcription factors can specify the differentiation pathway of adult stem cells. (*Molecular Endocrinology* 19: 964–971, 2005)**

**T**HE ANTERIOR PITUITARY gland develops from the somatic ectoderm in the roof of the oral cavity known as Rathke's pouch and consists of six hormone-secreting cell types. The pituitary cell types have been classified into three major cell lineages [GH-prolactin (PRL)-TSH, proopiomelanocortin, and FSH/LH] controlled by specific combinations of transcription factors and extracellular growth factors (1). Pituitary transcription factor-1 (Pit-1) is required for terminal differentiation of the GH-PRL-TSH cell lineage (1–3). In addition to specifying this cell lineage, Pit-1 directly stimulates transcription of GH, PRL, and TSH $\beta$  genes, as well as several regulatory genes involved in cell growth and homeostatic control (4–6). Pit-1 mutations cause a dwarf phenotype lacking GH, PRL, and TSH in mice (7) and humans (8).

Adult stem cells are generally considered to be tissue-restricted in their developmental potential (9). However, there have been recent examples in which stem cells cross tissue-specific barriers. Neural stem cells have been shown to transdifferentiate into hematopoietic elements (10) or myotubes (11) after transplantation into animals. Recently, insulin-producing cells have been produced in mouse liver after adenoviral-mediated delivery of islet-specific transcription

factors (12, 13). In this instance, liver parenchymal cells and pancreatic endocrine cells are of similar embryonic origin, perhaps facilitating the transdifferentiation process. Consistent with this idea, the induction of diabetes by streptozotocin destruction of the pancreatic  $\beta$ -cells is associated with the induction of a small number of insulin-producing cells in the liver (13).

In this study, we used the Pit-1 to test whether it is feasible to induce hepatic progenitors to differentiate into other endocrine cell types. After adenoviral delivery of Pit-1, the endogenous genes for PRL, GH, and TSH $\beta$  were activated in the liver, indicating that Pit-1 can induce differentiation in a tissue that does not normally express these hormones.

## RESULTS

### Pit-1 Induces Activation of Pituitary Hormone Genes in the Liver

Pit-1 gene was expressed in 50–80% of hepatocytes 3 to 7 d after Ad-Pit-1 injection [ $2 \times 10^9$  plaque-forming units (PFU)] into the mouse tail vein. Pit-1 expression was greatest in the hepatic lobules, but scattered expression was also observed in bile ductal cells and small cells in the periportal area (Fig. 1A). RT-PCR analysis of total RNA using rat-specific primers confirmed rat Pit-1 (rPit-1) expression in livers of mice injected with Ad-Pit-1. In female mice, Pit-1 activated expression of endogenous genes for a subset of mouse pituitary hormones (Fig. 1C). All of the Pit-1-positive livers expressed mouse PRL mRNA. Mouse GH and TSH $\beta$  mRNAs were detected in 36% (5 of 14) and 50% (7 of 14) of injections,

**First Published Online January 6, 2005**

Abbreviations: D2R, Dopamine 2 receptor; FGF, fibroblast growth factor; PCNA, proliferating cell nuclear antigen; PFU, plaque-forming unit(s); Pit-1, pituitary transcription factor-1; PRL, prolactin; rPit-1, rat Pit-1; TRH-R, TRH receptor.

***Molecular Endocrinology* is published monthly by The Endocrine Society (<http://www.endo-society.org>), the foremost professional society serving the endocrine community.**

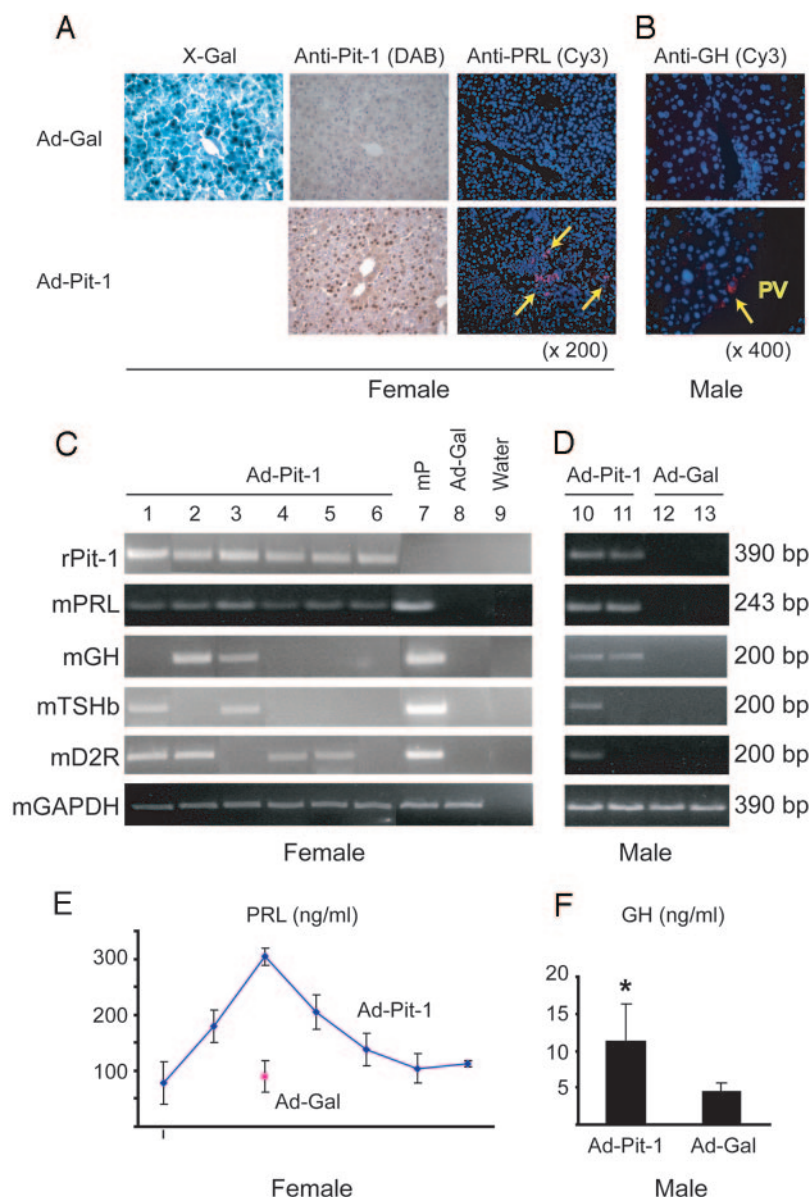

**Fig. 1.** Activation of Pituitary Hormone Genes in the Livers of Mice Treated with Ad-Gal or Ad-Pit-1

Mice were killed 7 d after tail vein injection of  $2 \times 10^9$  PFU of recombinant adenoviruses, and liver was removed for RNA isolation and histological preparation. A and B, Histological analysis of female (A) and male (B) mouse livers after treatment of adenoviral vectors. Removed liver of mice injected with Ad-Gal was embedded in tissue freezing medium, and frozen section was prepared. Slide was incubated with X-Gal substrate solution to visualize expression of the  $\beta$ -galactosidase gene (*top left panel*). Sections of paraffin-embedded tissues 4  $\mu$ m in thickness were used in immunohistochemical staining for Pit-1 and immunofluorescent staining for PRL and GH. All of the photomicrographs are  $\times 200$  magnification, except GH ( $\times 400$ ). C and D, RT-PCR analysis to determine the expression of transduced rPit-1 gene and the activation of mouse endogenous pituitary genes in female (C) and male (D) mice. An aliquot of each PCR was resolved by electrophoresis on 1.75–2.0% agarose gels, and DNA products were visualized with ethidium bromide. Lanes 1–6, 10, and 11, Ad-Pit-1 injection; lane 7, normal mouse pituitary; lanes 8, 12, and 13, Ad-Gal injection; lane 9, no DNA control. E and F, Serum levels for mouse PRL (E) and GH (F). Serum PRL and GH were measured by RIA using mouse-specific antibodies. Each time point was the mean ( $n = 6$ )  $\pm$  SD. \*,  $P < 0.05$ .

respectively. Dopamine 2 receptor (D2R) mRNA, which is specific to lactotropes, was expressed in 57% (8 of 14) of injections. TRH-receptor (TRH-R) mRNA expression was detected in 7.1% (1 of 14). In male mice (Fig. 1D), GH and PRL mRNAs were detected in all of the Pit-1-positive livers. TSH $\beta$  and D2R mRNA were detected in 50% (3 of

6) of injections. Other pituitary hormones (ACTH, LH, and FSH), which are not characteristic of the Pit-1 cell lineage, were not detected in either female or male mice (data not shown). There was no hepatic expression of mouse pituitary-specific genes in uninjected mice or control Ad-Gal-injected mice.

Immunofluorescent staining for mouse GH, PRL, and TSH $\beta$  was performed to investigate whether the expressed mRNAs were effectively translated into hormones in the liver cells. Focal cell clusters (0.2–0.5% of the hepatic cells in the section) positive for PRL were restricted to the periportal areas in female liver (Fig. 1A). Serum PRL was measured by RIA using a mouse-specific antibody. Serum PRL reached a peak at d 7 ( $304.0 \pm 15.3$  ng/ml) and then decreased to normal by d 28. Serum PRL was not increased in Ad-Gal-treated mice ( $89.2 \pm 28.3$  ng/ml at d 7) (Fig. 1E). In contrast to PRL, GH and TSH $\beta$  immunopositive cells were not detected in female livers that expressed these mRNAs (data not shown), suggesting that GH and TSH proteins are absent or very low in these cells. Consistent with these findings, serum GH and TSH levels were not increased in the Ad-Pit-1-injected mice (data not shown). In male mice, GH-positive cell clusters were detected in the portal area (Fig. 1B), but PRL or TSH $\beta$  immunopositive cells were absent. Serum GH levels ( $11.3 \pm 4.4$  ng/ml) were greater in Ad-Pit-1-injected male mice than in Ad-Gal-injected mice ( $5.1 \pm 1.2$  ng/ml) (Fig. 1F). However, other pituitary hormone levels were not elevated.

PRL levels in serum might also reflect Ad-Pit-1 expression in nonhepatic tissues. We previously observed that systemic administration of adenoviral vector results in transgene expression mainly in liver and lung, with low levels of expression in the glomeruli of kidney, but not in the pituitary (14). Consistent with these results, rat Pit-1 expression was also detected in kidney by RT-PCR, and rare glomerular cells were immunopositive for Pit-1. However, no pituitary hormone expression was detected in the kidney (data not shown).

To further assess the possibility that Ad-Pit-1 might transactivate endogenous pituitary genes, mice were hypophysectomized before injection with a reduced

amount of adenoviruses ( $1 \times 10^9$  PFU) because of vulnerability to stress. After injection of Ad-Pit-1, Pit-1 was expressed in 30–50% of liver cells (Fig. 2A). RT-PCR confirmed expression of mRNAs for PRL, GH, TSH $\beta$ , and D2R (Fig. 2B), and immunopositive PRL cells were found near the portal area in the liver (Fig. 2A). Serum PRL was elevated (98.6 ng/ml) compared with Ad-Gal-injected mice ( $<0.1$  ng/ml). GH and TSH were not elevated in either group of animals (data not shown). Thus, the increased serum PRL level after Ad-Pit-1 injection is independent of Pit-1- or stress-induced PRL production by preexisting pituitary lactotropes.

### Differentiation of Hepatic Stem Cells into PRL-Producing Cells

PRL-positive cells were oval-shaped and smaller than normal hepatocytes 5 to 7 d after Ad-Pit-1 treatment. These cells had a high nuclear/cytoplasmic ratio, suggesting that they were proliferating. Immunofluorescence for proliferating cell nuclear antigen (PCNA) demonstrated that the PRL-positive cells were also positive for PCNA (Fig. 3), consistent with a proliferating cell population. Of note, PCNA was detected throughout the livers of mice injected with either Ad-Gal or Ad-Pit-1 (Fig. 3), presumably because the adenoviral injection induced hepatitis and hepatic regeneration. PCNA was seen in both normal hepatocytes and in the small cell populations (data not shown), indicating that regeneration occurs in both normal hepatocytes and hepatic progenitor populations. Although regeneration activity occurred in normal hepatocytes transduced with rPit-1, PRL positivity was not detected in these cells, indicating that the potential for PRL expression is possessed by a limited subpopulation of liver cells. The origin of these PRL-positive cells was investigated using double-labeled immunofluo-

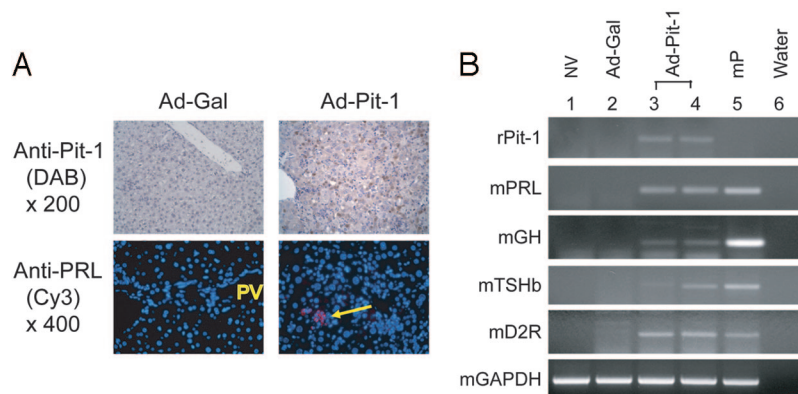

**Fig. 2.** Activation of Pituitary Hormone Genes in the Livers of Hypophysectomized Female Mice Treated with Ad-Pit-1

Mice were killed 7 d after tail vein injection of  $1 \times 10^9$  PFU of recombinant adenoviruses, and liver was removed for RNA isolation and histological preparation. A, Paraffin sections ( $4 \mu\text{m}$ ) were used for immunohistochemical and immunofluorescent staining to detect Pit-1 (upper panel,  $\times 200$ ) and PRL (lower panel,  $\times 400$ ), respectively. B, RT-PCR analysis was performed to determine the expression of transduced rPit-1 gene and the activation of mouse endogenous pituitary genes. Lane 1, Uninjected control, no virus (NV); lane 2, Ad-Gal injection; lanes 3 and 4, Ad-Pit-1 injection; lane 5, normal mouse pituitary (mP); lane 6, no DNA control.



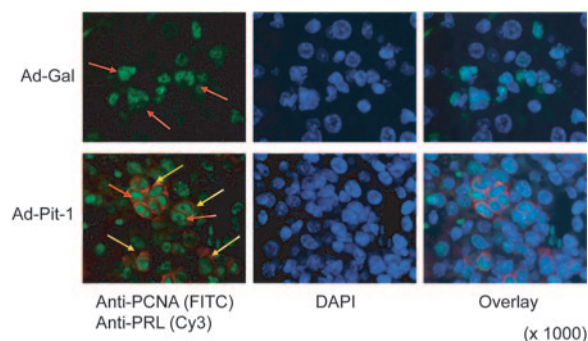

**Fig. 3.** Colocalization of PCNA and PRL in Livers of Mice Treated with Ad-Gal or Ad-Pit-1

Paraffin sections of livers of mice at d 7 after treatment were analyzed by double immunofluorescence staining for PRL and PCNA. Cells with green fluorescent nuclei express PCNA (red arrows), and cells with red fluorescent cytoplasm express PRL (yellow arrows). All of the photomicrographs are high magnification views ( $\times 1000$ ).

rescence staining. At the earlier stages (d 3–5), PRL-positive cells were also positive for the hepatic stem cell markers c-Kit, Thy-1, and cytokeratin 14 (Fig. 4). However, these markers were no longer present in PRL-positive cell clusters after d 7, suggesting that the PRL-positive cells are derived from hepatic stem cells.

Double-labeled immunofluorescence for PRL and Pit-1 was performed to investigate the relationship between Pit-1 and PRL-positive cells. At d 3 after Ad-Pit-1 injection, Pit-1 was expressed in the nucleus of single or double cells that were also positive for PRL (Fig. 5). However, by d 7, there was an unexpected dissociation of Pit-1 and PRL expression. Pit-1 continued to be expressed in isolated normal hepatocytes, but most PRL expression was seen in small cell clusters (32–64 cells) that did not express Pit-1 (Fig. 5), suggesting episomal dilution of adenovirus-mediated Pit-1 gene transduction.

### Time-Course of PRL Expression

PRL expression in mouse livers was analyzed at d 3, 5, 7, 14, 21, 28, and 56 to investigate the fate of PRL-positive cells over time. By RT-PCR, the adenoviral-delivered rPit-1 gene expression diminished by d 21 and its expression was undetectable by d 28. The activated expression of endogenous pituitary-specific genes (mPRL, mGH, mTSH $\beta$ , and mD2R) decreased in parallel with the decline of Pit-1 gene expression (Fig. 6A).

Immunohistochemistry showed that Pit-1 expression peaked at d 3–7, diminished at d 14, and disappeared by d 21 (Fig. 6B). Single or double cells were positive for PRL in the periportal area at d 3. PRL-positive cells formed a cluster of small cells with a high nuclear/cytoplasmic ratio at d 5–7. At d 14, PRL positivity spread out from the hepatic lobule, and it diminished by d 21. Pit-1 and PRL were no longer detected at d 28 and 56 (data not shown).

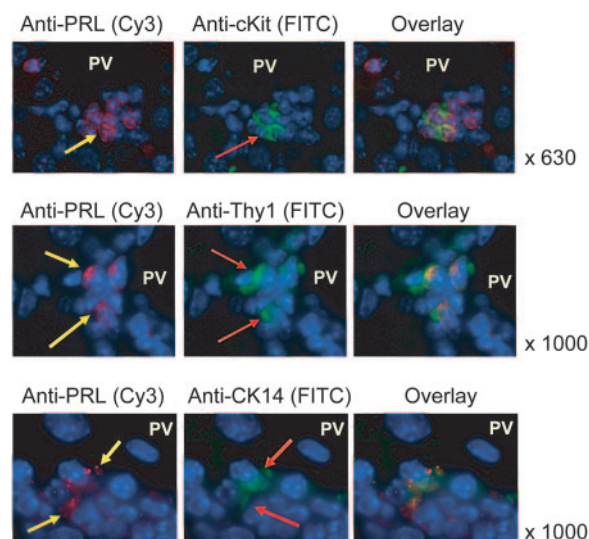

**Fig. 4.** Colocalization of PRL with Stem Cell Markers in Livers of Mice Treated with Ad-Pit-1

Paraffin sections of livers of mice at d 5 after treatment were analyzed by double immunofluorescence staining for PRL with c-Kit, Thy-1, or cytokeratin 14. Cells with red fluorescent cytoplasm express PRL (yellow arrows in left panels), and cells with green fluorescent cytoplasm (red arrows in center panels) express c-Kit (top), Thy-1 (middle), or cytokeratin 14 (bottom). PV, Portal vein. Magnification, top panels,  $\times 630$ ; middle and bottom panels,  $\times 1000$ .

### DISCUSSION

In this study, we have shown that adenoviral gene delivery of the Pit-1 induces the differentiation of mouse liver cells into pituitary progenitors that express an array of genes characteristic of the early lactotrope lineage (PRL, GH, TSH $\beta$ , D2R, TRH-R). Pituitary genes

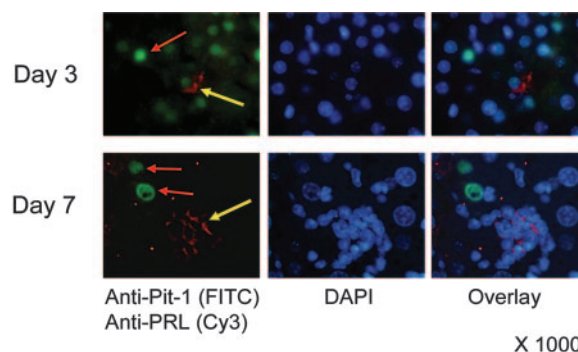

**Fig. 5.** Colocalization of PRL and Pit-1 in Livers of Mice Treated with Ad-Pit-1

Paraffin sections of livers of mice at d 3 and 7 after treatment with Ad-Pit-1 were analyzed by double immunofluorescence staining for PRL and Pit-1. Cells with green fluorescent nuclei express Pit-1 (red arrows in left panels), and cells with red fluorescent cytoplasm express PRL (yellow arrows in left panels). All of the photomicrographs are high magnification views ( $\times 1000$ ).

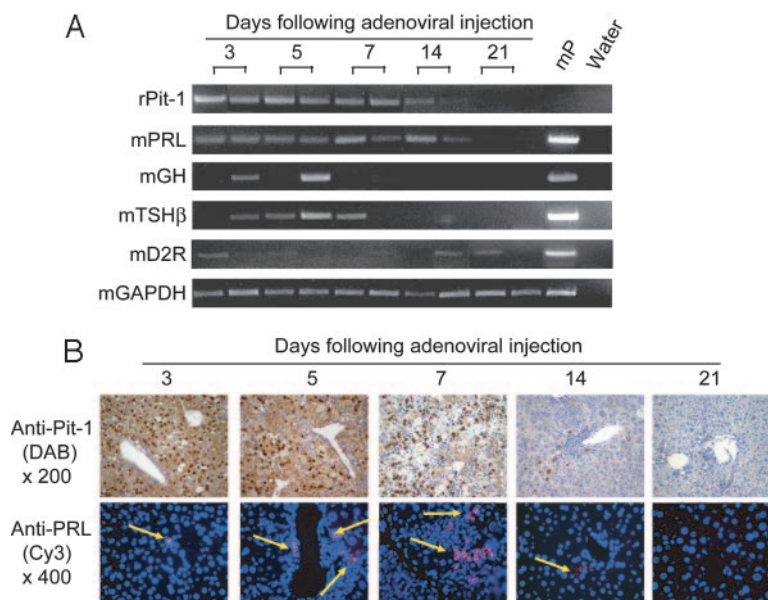

**Fig. 6.** Time Course of PRL Cells in Livers of Mice Treated with Ad-Pit-1

After injection of recombinant adenoviruses, mice were killed, and livers were removed at different time points (d 3, 5, 7, 14, and 21). A, Total RNA extracted from livers was subjected to RT-PCR analysis to determine the expression of transduced rPit-1 gene and the activation of mouse endogenous pituitary genes. mP, Normal mouse pituitary; Water, no DNA control. B, Histological analysis of liver. Sections (4  $\mu$ m) of paraffin-embedded tissues were used in immunohistochemical and immunofluorescent staining for Pit-1. Magnification, *upper panels*,  $\times 200$ ; *lower panels*, PRL expression,  $\times 400$ .

from other cell lineages, such as corticotropes (ACTH) or gonadotropes (LH, FSH), were not induced, indicating lineage-specific effects of Pit-1. Although Pit-1 expression was detected in 50–80% of hepatocytes, PRL-positive cells comprised only 0.2–0.5% of the liver cells. This selected cell population was positive for hepatic stem cell markers (Thy-1, c-Kit, and cytokeratin 14), suggesting that the potential for differentiation is conferred by a progenitor cell population in the liver.

It is notable that Pit-1 expression is transient and is absent from many of the cells that express PRL. The transient expression of Pit-1 is consistent with the properties of adenovirus-delivered genes, which are episomal and become degraded after several weeks. As the progenitor cells divide, Pit-1 may be progressively diluted, until it is finally lost entirely. The transient exposure to Pit-1 appears to be sufficient to direct cells into the lactotrope lineage. However, this population is not sustained long term and ultimately disappears after about 14–21 d.

The hepatic progenitor cells include the so-called oval cells located in the canal of Hering (15). In some types of liver damage, these small cells, which have a high nuclear/cytoplasmic ratio, emerge in the portal zone, proliferate extensively, migrate into the lobule, and eventually become differentiated hepatocytes (15). PRL-positive cells appear to follow a similar course. After injection of Ad-Pit-1, small PRL-positive cells appeared in the periportal area at d 3, began to proliferate, and formed clusters of small cells by d 5–7.

By d 14, large PRL-positive cells spread toward the central vein.

The hepatic oval cells are known to be bipotential and retain the ability to differentiate into both the bile duct epithelial and hepatocyte lineages *in vitro* (16). They express markers characteristic of both bile duct epithelium (cytokeratin 19) (17) and hepatocytes (albumin). Oval cells are also immunoreactive to antibodies generally associated with hematopoietic lineages including Thy-1, CD34, and c-Kit, suggesting that oval cells originate from hematopoietic stem cells (18). The PRL-positive cells were immunopositive for Thy-1 and c-Kit, suggesting that the oval cells are the likely progenitor population for the PRL-producing cells.

Although stem cell plasticity has been demonstrated in many tissues *in vivo* (10, 11, 19–21), it is likely that multiple factors are required to induce cell-specific differentiation. Hepatic oval cells can be differentiated to insulin-producing pancreatic islet cells by culturing in high-glucose medium (22), presumably because glucose provides a stimulus for insulin production. Primary neural stem cells, when cocultured with differentiating myotubes, differentiate into myocytes (23). Hepatic oval cells transdifferentiate into microglial cells after transplantation to the neonatal mouse brain (24). Kojima *et al.* (13) demonstrated that coinjection of adenoviral vectors carrying Neuro-D or betacellulin facilitated more efficient differentiation of liver cells into insulin-producing cells than either factor alone. These results indicate that the microenvironment and cell extrinsic factors are likely to play a role in stem cell

plasticity, although the transduced transcription factor is a key regulator of cell fate.

We hypothesize that hepatic stem cells transduced with the Pit-1 gene might be stimulated by local factors to differentiate further into pituitary lineage cells. Maturation of the Pit-1-directed cell lineage into somatotropes, lactotropes, or thyrotropes requires the additional expression of GHRH receptor, which stimulates GH production (25); estrogen receptor, which stimulates PRL production (26); and thyrotrope embryonic factor, which stimulates TSH $\beta$  production (27). Liver parenchymal cells are known to express estrogen receptor but not GHRH receptor or thyrotrope embryonic factor (28), perhaps explaining the preferential production of PRL vs. GH or TSH in female mice. Interestingly, GH production was seen in male mice transduced with Pit-1. It has been suggested that cell type-specific expression of GH and PRL is determined by Pit-1 association with either coactivators or corepressors, directly or indirectly (1). The preferential production of GH in the male and PRL in the female liver might be related to sex steroid effects, but this remains to be tested directly. The hepatitis associated with adenovirus infection leads to hepatic regeneration, which induces a variety of growth factors such as TGF $\beta$ 3 and fibroblast growth factor (FGF)-2 (29–31). FGF2 is known to stimulate PRL promoter activity and PRL secretion in normal and tumorous lactotrope-origin GH4 cells (32, 33). FGF-2 has also been shown to initiate lactotrope differentiation and maintain PRL expression in mouse pituitary GHFT cells that harbor Pit-1 (34). The ultimate decline of PRL expression after about 21 d demonstrates that adenoviral-delivered Pit-1 is not sufficient to sustain long-term lactotrope cell regeneration. This likely reflects the transient nature of Pit-1 expression, the absence of induction of endogenous mouse Pit-1, and loss of paracrine stimulation of growth factors (data not shown). In contrast, adenoviral-delivered rat pancreatic-duodenal homeobox-1 induces expression of mouse pancreatic-duodenal homeobox-1, resulting in long-term production of insulin-producing cells in the liver (35). Viruses designed to integrate Pit-1 into the genome may be capable of inducing PRL-producing cells for longer periods of time.

In summary, we have shown that adenoviral gene delivery of Pit-1 transcription factor induces transient differentiation of mouse liver cells into pituitary PRL-producing cells. The PRL-producing cells are most likely differentiated from hepatic stem cells in a process driven by the Pit-1 transcription factor, perhaps in conjunction with the expression of local regenerative growth factors (TGF- $\beta$ 3 and FGF-2). These data further elucidate pathways of stem cell plasticity and suggest strategies for using developmental transcription factors to induce adult stem cells to differentiate along specified lineage pathways.

## MATERIALS AND METHODS

### Generation of Adenoviral Vectors

A cassette containing the rPit-1 cDNA (cloned by RT-PCR using total RNA extracted from GH3 cells) driven by the cytomegalovirus promoter/enhancer with a simian virus 40 polyadenylation sequence was subcloned into an adenoviral transfer plasmid (36) based on pCDNA3 (Invitrogen, Carlsbad, CA). This plasmid was used to generate recombinant adenovirus, Ad-Pit-1, as described previously (36). Ad-Gal (14), which contains  $\beta$ -galactosidase driven by cytomegalovirus promoter, was used as a control.

### Injection of Adenovirus *in Vivo*

Six- to 7-wk-old mice (C57BL6, 25–28 g in body weight) were housed in a barrier facility with a 12-h light, 12-h dark cycle and were fed a standard unrestricted diet. Female mice were injected with  $2 \times 10^9$  PFU of recombinant adenoviruses through the tail vein and were euthanized at various time points (d 3, 5, 7, 14, 21, 28, and 56). Male mice were injected at 8 wk of age and were killed at d 7. Hypophysectomized female mice were purchased from Jackson Laboratory (Bar Harbor, ME) and housed in a barrier facility for 7 d with hydrocortisone (Sigma, St. Louis, MO) replacement (500  $\mu$ g/kg body wt sc daily) before injection with Ad-Pit-1 or Ad-Gal ( $1 \times 10^9$  PFU). After euthanization, the pituitary region was examined to confirm complete hypophysectomy. Blood was drawn from the retroorbital sinus for measurements of mouse pituitary hormones. For the isolation of hepatic RNA, the liver was immediately frozen in liquid nitrogen and stored at  $-80^\circ\text{C}$ . Remaining liver samples were fixed in neutral buffered formalin and embedded in paraffin for immunohistochemical staining. Serum levels for mouse PRL, GH, and TSH $\beta$  were measured by RIA in hormone assay core at the Vanderbilt Mouse Metabolic Phenotyping Center (Nashville, TN) using mouse-specific antibodies. All studies using mice were approved by the Northwestern University Medical School Animal Care and Use Committee.

### RT-PCR Measurement of Gene Expression

Total RNA was isolated from frozen liver tissues using TRIzol reagent (Invitrogen) as described by the manufacturer. A total of 20  $\mu$ g of RNA was treated with DNase-I (Promega, Madison, WI) for 30 min at room temperature. Random hexamers and avian myeloblastosis virus reverse transcriptase (RT) were used to synthesize cDNA using 10  $\mu$ g of DNase-I-treated RNA. A portion (1/40) of the cDNA solution was used for amplification of rPit-1, mPRL, mGH, mTSH $\beta$ , mTRH-R, mD2R, and mGAPDH. Cycle conditions were: 2 min hot start at 96  $^\circ\text{C}$ , followed by 35 cycles of 1 min at 94  $^\circ\text{C}$ , 1 min at 55  $^\circ\text{C}$ , followed by 1.5 min at 72  $^\circ\text{C}$ , and a final extension at 72  $^\circ\text{C}$  for 10 min. An aliquot (20%) of each PCR was resolved by electrophoresis on 1.75–2.0% agarose gels, and DNA products were visualized with ethidium bromide. Oligonucleotides used for PCR amplification were as follows: rPit-1 (385 bp), forward 5'-GCGGAGGACCCACAGCCTCTGAATT-3', and reverse 5'-CCTTAGCGGCGATACTGATAGTGTGC-3'; mPRL (243bp), forward 5'-ATCAATGACTGCCCACTT-3', and reverse 5'-GCTAATTATCTTCTCAACTC-3'; mGH (200 bp), forward 5'-ATTTTCACCAACAGCCTGATG-3', and reverse 5'-GCAGCCCATAGTTTTTGAGC-3'; mTSH $\beta$  (200 bp), forward 5'-CAAGCAGCATCCTTTGTATTTC-3', and reverse 5'-CCACCGTTCTGTAGATGAAGTC-3'; mD2R (180 bp), forward 5'-GTCCTTCACCATCTCTTGC-3', and reverse 5'-CTGCTACGCTTGTTGTGAC-3'; mTRH-R (200 bp), forward 5'-CCAGGAAATTGGTCTTTC-3' and reverse 5'-TGCTGAAGCGGTCTGACTC-3'; and mGAPDH (390 bp), forward 5'-CCAAAGTTGTCATGGATGA-



C-3' and reverse 5'-CCCTTCATTGACCTCAACTA-3'. The primers designed to detect the ectopic rat Pit-1 expression do not amplify the mouse homolog.

### Immunohistochemistry and immunofluorescence

Sections of paraffin-embedded tissues 4  $\mu$ m in thickness were used for immunostaining. Immunohistochemistry using an ABC kit and DAB chromogen (Vector Laboratories, Inc., Burlingame, CA) was performed to detect rPit-1. The expression of PRL, GH, and TSH $\beta$  was examined using immunofluorescence staining. Double immunofluorescence was performed to detect the colocalization of PRL with Pit-1, PCNA, c-Kit, Thy1, or cytokeratin 14. The primary antibodies, including rabbit polyclonal anti-Pit-1 (sc-442, 7.5  $\mu$ g/ml), goat polyclonal anti-PRL (sc-7807, 7.5  $\mu$ g/ml), goat polyclonal anti-GH (sc-10364, 7.5  $\mu$ g/ml), goat polyclonal anti-TSH $\beta$  (sc-7815, 7.5  $\mu$ g/ml), mouse monoclonal anti-PCNA (sc-56, 5.0  $\mu$ g/ml), rat monoclonal anti-c-Kit (sc-19619, 7.5  $\mu$ g/ml), and rabbit polyclonal anti-Thy1 (sc-9163, 7.5  $\mu$ g/ml), were purchased from Santa Cruz Biotechnology, Inc. (Santa Cruz, CA). Other primary antibody included mouse monoclonal anticytokeratin 14 (RTU-LL002, NovoCastra Laboratories Ltd., Newcastle, UK). Secondary staining reagents including Cy3-conjugated antigoat IgG (Jackson ImmunoResearch Laboratories, Inc., West Grove, PA), biotinylated secondary antibodies (antirabbit, -goat, -mouse, or -rat IgG, Vector Laboratories), and fluorescein-streptavidin (Vector Laboratories) were titrated individually for minimal nonspecific signal. For the detection of Pit-1, PCNA, and cytokeratin 14, slides were microwaved in 10 mM sodium citrate buffer (pH 6.0) for 10 min. Trypsin (T-7168, Sigma) treatment was performed to detect c-Kit and Thy-1. The MOM kit (Vector Laboratories) was used to minimize nonspecific signal from the mouse-origin primary antibodies on mouse tissue. To minimize the autofluorescence, slides were incubated in 70% ethanol supplemented with 0.1% sudan black B for 15 min and washed vigorously in running water. Fluorescent mounting media (Vector Laboratories) containing 4',6' diamidino-2 phenylindol was used for nuclei-counterstaining and mounting. Images were obtained using a Zeiss Axioskop fluorescent microscope (Carl Zeiss Microimaging Inc., Thornwood, NY).

### Acknowledgments

We are grateful to Tom Kotlar for support and discussion.

Received January 28, 2004. Accepted December 20, 2004.

Address all correspondence and requests for reprints to: J. Larry Jameson, M.D., Ph.D., Division of Endocrinology, Metabolism and Molecular Medicine, Northwestern University Feinberg School of Medicine, Galter Pavilion, Suite 3-150, 251 East Huron Street, Chicago, Illinois 60611-2908. E-mail: ljjameson@northwestern.edu.

### REFERENCES

1. Scully KM, Rosenfeld MG 2002 Pituitary development: regulatory codes in mammalian organogenesis. *Science* 295:2231–2235
2. Ingraham HA, Chen RP, Mangalam HJ, Elsholtz HP, Flynn SE, Lin CR, Simmons DM, Swanson L, Rosenfeld MG 1988 A tissue-specific transcription factor containing a homeodomain specifies a pituitary phenotype. *Cell* 55: 519–529
3. Scully KM, Jacobson EM, Jepsen K, Lunyak V, Viadiu H, Carriere C, Rose DW, Hooshmand F, Aggarwal AK, Rosenfeld MG 2000 Allosteric effects of Pit-1 DNA sites on long-term repression in cell type specification. *Science* 290:1127–1131
4. Lira SA, Crenshaw 3rd EB, Glass CK, Swanson LW, Rosenfeld MG 1988 Identification of rat growth hormone genomic sequences targeting pituitary expression in transgenic mice. *Proc Natl Acad Sci USA* 85:4755–4759
5. Crenshaw 3rd EB, Kalla K, Simmons DM, Swanson LW, Rosenfeld MG 1989 Cell-specific expression of the prolactin gene in transgenic mice is controlled by synergistic interactions between promoter and enhancer elements. *Genes Dev* 3:959–972
6. Kishimoto M, Okimura Y, Yagita K, Iguchi G, Fumoto M, Iida K, Kaji H, Okamura H, Chihara K 2002 Novel function of the transactivation domain of a pituitary-specific transcription factor, Pit-1. *J Biol Chem* 277:45141–45148
7. Li S, Crenshaw 3rd EB, Rawson EJ, Simmons DM, Swanson LW, Rosenfeld MG 1990 Dwarf locus mutants lacking three pituitary cell types result from mutations in the POU-domain gene Pit-1. *Nature* 347:528–533
8. Radovick S, Nations M, Du Y, Berg LA, Weintraub BD, Wondisford FE 1992 A mutation in the POU-homeodomain of Pit-1 responsible for combined pituitary hormone deficiency. *Science* 257:1115–1118
9. Tsai RY, Kittappa R, McKay RD 2002 Plasticity, niches, and the use of stem cells. *Dev Cell* 2:707–712
10. Bjornson CR, Rietze RL, Reynolds BA, Magli MC, Vescovi AL 1999 Turning brain into blood: a hematopoietic fate adopted by adult neural stem cells in vivo. *Science* 283:534–537
11. Galli R, Borello U, Gritti A, Minasi MG, Bjornson C, Coletta M, Mora M, De Angelis MG, Fiocco R, Cossu G, Vescovi AL 2000 Skeletal myogenic potential of human and mouse neural stem cells. *Nat Neurosci* 3:986–991
12. Ferber S, Halkin A, Cohen H, Ber I, Einav Y, Goldberg I, Barshack I, Seijffers R, Kopolovic J, Kaiser N, Karasik A 2000 Pancreatic and duodenal homeobox gene 1 induces expression of insulin genes in liver and ameliorates streptozotocin-induced hyperglycemia. *Nat Med* 6:568–572
13. Kojima H, Fujimiya M, Matsumura K, Younan P, Imaeda H, Maeda M, Chan L 2003 NeuroD-beta cellulin gene therapy induces islet neogenesis in the liver and reverses diabetes in mice. *Nat Med* 9:596–603
14. Lee EJ, Thimmapaya B, Jameson JL 2000 Stereotactic injection of adenoviral vectors that target gene expression to specific pituitary cell types: implications for gene therapy. *Neurosurgery* 46:1461–1468; discussion 1468–1469
15. Grompe M, Finegold M 2001 Liver stem cells. In: Marshak DR, Gardner RL, David G, eds. *Stem cell biology*. Cold Spring Harbor, NY: Cold Spring Harbor Laboratory Press; 455–498
16. Sirica AE 1995 Ductular hepatocytes. *Histol Histopathol* 10:433–456
17. Bouwens L, Wang RN, De Blay E, Pipeleers DG, Kloppel G 1994 Cytokeratins as markers of ductal cell differentiation and islet neogenesis in the neonatal rat pancreas. *Diabetes* 43:1279–1283
18. Petersen BE, Bowen WC, Patrene KD, Mars WM, Sullivan AK, Murase N, Boggs SS, Greenberger JS, Goff JP 1999 Bone marrow as a potential source of hepatic oval cells. *Science* 284:1168–1170
19. Ferrari G, Cusella-De Angelis G, Coletta M, Paolucci E, Stornaiuolo A, Cossu G, Mavilio F 1998 Muscle regeneration by bone marrow-derived myogenic progenitors. *Science* 279:1528–1530
20. Jackson KA, Mi T, Goodell MA 1999 Hematopoietic potential of stem cells isolated from murine skeletal muscle. *Proc Natl Acad Sci USA* 96:14482–14486
21. Janus A, Holz GG, Theise ND, Hussain MA 2003 In vivo derivation of glucose-competent pancreatic endocrine cells from bone marrow without evidence of cell fusion. *J Clin Invest* 111:843–850

22. Yang L, Li S, Hatch H, Ahrens K, Cornelius JG, Petersen BE, Peck AB 2002 In vitro trans-differentiation of adult hepatic stem cells into pancreatic endocrine hormone-producing cells. *Proc Natl Acad Sci USA* 99:8078–8083
23. Rietze RL, Valcanis H, Brooker GF, Thomas T, Voss AK, Bartlett PF 2001 Purification of a pluripotent neural stem cell from the adult mouse brain. *Nature* 412:736–739
24. Deng J, Steindler DA, Laywell ED, Petersen BE 2003 Neural trans-differentiation potential of hepatic oval cells in the neonatal mouse brain. *Exp Neurol* 182:373–382
25. Godfrey P, Rahal JO, Beamer WG, Copeland NG, Jenkins NA, Mayo KE 1993 GHRH receptor of little mice contains a missense mutation in the extracellular domain that disrupts receptor function. *Nat Genet* 4:227–232
26. Simmons DM, Voss JW, Ingraham HA, Holloway JM, Broide RS, Rosenfeld MG, Swanson LW 1990 Pituitary cell phenotypes involve cell-specific Pit-1 mRNA translation and synergistic interactions with other classes of transcription factors. *Genes Dev* 4:695–711
27. Drolet DW, Scully KM, Simmons DM, Wegner M, Chu KT, Swanson LW, Rosenfeld MG 1991 TEF, a transcription factor expressed specifically in the anterior pituitary during embryogenesis, defines a new class of leucine zipper proteins. *Genes Dev* 5:1739–1753
28. Yamashita S, Korach KS 1989 A modified immunohistochemical procedure for the detection of estrogen receptor in mouse tissues. *Histochemistry* 90:325–330
29. Baruch Y, Shoshany G, Neufeld G, Enat R 1995 Basic fibroblast growth factor is hepatotropic for rat liver in regeneration. *J Hepatol* 23:328–332
30. Hioki O, Minemura M, Shimizu Y, Kasii Y, Nishimori H, Takahara T, Higuchi K, Yoshitake Y, Nishikawa K, Watanabe A 1996 Expression and localization of basic fibroblast growth factor (bFGF) in the repair process of rat liver injury. *J Hepatol* 24:217–224
31. Tahashi Y, Matsuzaki K, Date M, Yoshida K, Furukawa F, Sugano Y, Matsushita M, Himeno Y, Inagaki Y, Inoue K 2002 Differential regulation of TGF- $\beta$  signal in hepatic stellate cells between acute and chronic rat liver injury. *Hepatology* 35:49–61
32. Porter TE, Wiles CD, Frawley LS 1994 Stimulation of lactotrope differentiation *in vitro* by fibroblast growth factor. *Endocrinology* 134:164–168
33. Schweppe RE, Frazer-Abel AA, Gutierrez-Hartmann A, Bradford AP 1997 Functional components of fibroblast growth factor (FGF) signal transduction in pituitary cells. Identification of FGF response elements in the prolactin gene. *J Biol Chem* 272:30852–30859
34. Lopez-Fernandez J, Palacios D, Castillo AI, Tolon RM, Aranda A, Karin M 2000 Differentiation of lactotrope precursor GHFT cells in response to fibroblast growth factor-2. *J Biol Chem* 275:21653–21660
35. Ber I, Shternhall K, Perl S, Ohanuna Z, Goldberg I, Barshack I, Benvenisti-Zarum L, Meivar-Levy I, Ferber S 2003 Functional, persistent, and extended liver to pancreas transdifferentiation. *J Biol Chem* 278:31950–31957
36. Lee EJ, Anderson LM, Thimmapaya B, Jameson JL 1999 Targeted expression of toxic genes directed by pituitary hormone promoters: a potential strategy for adenovirus-mediated gene therapy of pituitary tumors. *J Clin Endocrinol Metab* 84:786–794

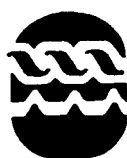

Source: http://academic.oup.com/mend/article-pdf/19/4/964/8951725/mend0964.pdf
